# Supplementary material for: Comparisons of the tropospheric specific humidity from GPS radio occultations with ERA–Interim, NASA MERRA and AIRS data
Source: Copernicus journal article supplement (doi:10.5194/amt-2017-250), 2017-08-18
Supplement: Supplementary file [file amt-2017-250-AC6-supplement.pdf]

1 **Comparisons of the tropospheric specific humidity from GPS radio occultations with**  
2 **ERA–Interim, NASA MERRA and AIRS data**

3

4 Panagiotis Vergados<sup>1</sup>, Anthony J. Mannucci<sup>1</sup>, Chi O. Ao<sup>1</sup>, Olga Verkhoglyadova<sup>1</sup>, and Byron  
5 Iijima<sup>1</sup>

6

7 <sup>1</sup> Jet Propulsion Laboratory, California Institute of Technology, Pasadena, California, USA

8

9 **Corresponding author:** P. Vergados, Jet Propulsion Laboratory, M/S 138-310B, 4800 Oak  
10 Grove Dr., Pasadena, CA, 91109, USA. (Panagiotis.Vergados@jpl.nasa.gov)

11

12

13

14

15

16

17

18

19

20

21 **Table S1.** This is the same as Table 1, but for the  $\pm 15\text{-}30^\circ$  climate zone.  
 22

| <b>PART I: 9-year long mean of specific humidity climatology with 2-sigma uncertainty, g kg<sup>-1</sup></b>                     |                                 |                                 |                                 |                                 |                                 |
|----------------------------------------------------------------------------------------------------------------------------------|---------------------------------|---------------------------------|---------------------------------|---------------------------------|---------------------------------|
| <b>Data Records</b>                                                                                                              | <b>JPL</b>                      | <b>UCAR</b>                     | <b>ERA-Interim</b>              | <b>MERRA</b>                    | <b>AIRS</b>                     |
| 400 hPa                                                                                                                          | 0.64 ± 0.12                     | 0.55 ± 0.08                     | 0.57 ± 0.06                     | 0.54 ± 0.10                     | 0.49 ± 0.08                     |
| 500 hPa                                                                                                                          | 1.22 ± 0.28                     | 1.12 ± 0.24                     | 1.17 ± 0.22                     | 1.15 ± 0.24                     | 1.07 ± 0.22                     |
| 600 hPa                                                                                                                          | 2.17 ± 0.44                     | 1.93 ± 0.38                     | 2.13 ± 0.38                     | 2.24 ± 0.42                     | 2.09 ± 0.38                     |
| 700 hPa                                                                                                                          | 3.44 ± 0.50                     | 3.28 ± 0.54                     | 3.48 ± 0.44                     | 3.77 ± 0.44                     | 3.48 ± 0.44                     |
| <b>PART II: 9-year long mean of deviations from JPL, g kg<sup>-1</sup></b>                                                       |                                 |                                 |                                 |                                 |                                 |
| 400 hPa                                                                                                                          | n/a                             | - 0.09                          | - 0.07                          | - 0.10                          | - 0.16                          |
| 500 hPa                                                                                                                          | n/a                             | - 0.11                          | - 0.05                          | - 0.07                          | - 0.15                          |
| 600 hPa                                                                                                                          | n/a                             | - 0.23                          | - 0.02                          | - 0.09                          | - 0.07                          |
| 700 hPa                                                                                                                          | n/a                             | - 0.16                          | + 0.04                          | + 0.33                          | + 0.04                          |
| <b>PART III: Linear regression of specific humidity anomalies with 2-sigma uncertainty, g kg<sup>-1</sup> month<sup>-1</sup></b> |                                 |                                 |                                 |                                 |                                 |
| 400 hPa                                                                                                                          | $(-0.7 \pm 1.8) \times 10^{-4}$ | $(1.1 \pm 1.2) \times 10^{-4}$  | $(0.3 \pm 1.0) \times 10^{-4}$  | $(-0.3 \pm 1.0) \times 10^{-4}$ | $(-0.3 \pm 1.0) \times 10^{-4}$ |
| 500 hPa                                                                                                                          | $(-0.5 \pm 3.6) \times 10^{-4}$ | $(1.6 \pm 2.8) \times 10^{-4}$  | $(-0.1 \pm 2.2) \times 10^{-4}$ | $(-1.3 \pm 2.2) \times 10^{-4}$ | $(-1.9 \pm 2.0) \times 10^{-4}$ |
| 600 hPa                                                                                                                          | $(-6.9 \pm 6.6) \times 10^{-4}$ | $(1.8 \pm 4.8) \times 10^{-4}$  | $(-1.9 \pm 3.4) \times 10^{-4}$ | $(-5.0 \pm 3.8) \times 10^{-4}$ | $(-5.2 \pm 3.2) \times 10^{-4}$ |
| 700 hPa                                                                                                                          | $(-3.9 \pm 8.6) \times 10^{-4}$ | $(-0.4 \pm 7.2) \times 10^{-4}$ | $(-3.8 \pm 4.8) \times 10^{-4}$ | $(-7.5 \pm 4.6) \times 10^{-4}$ | $(-6.2 \pm 4.4) \times 10^{-4}$ |

23  
 24  
 25  
 26  
 27  
 28  
 29  
 30  
 31  
 32  
 33  
 34

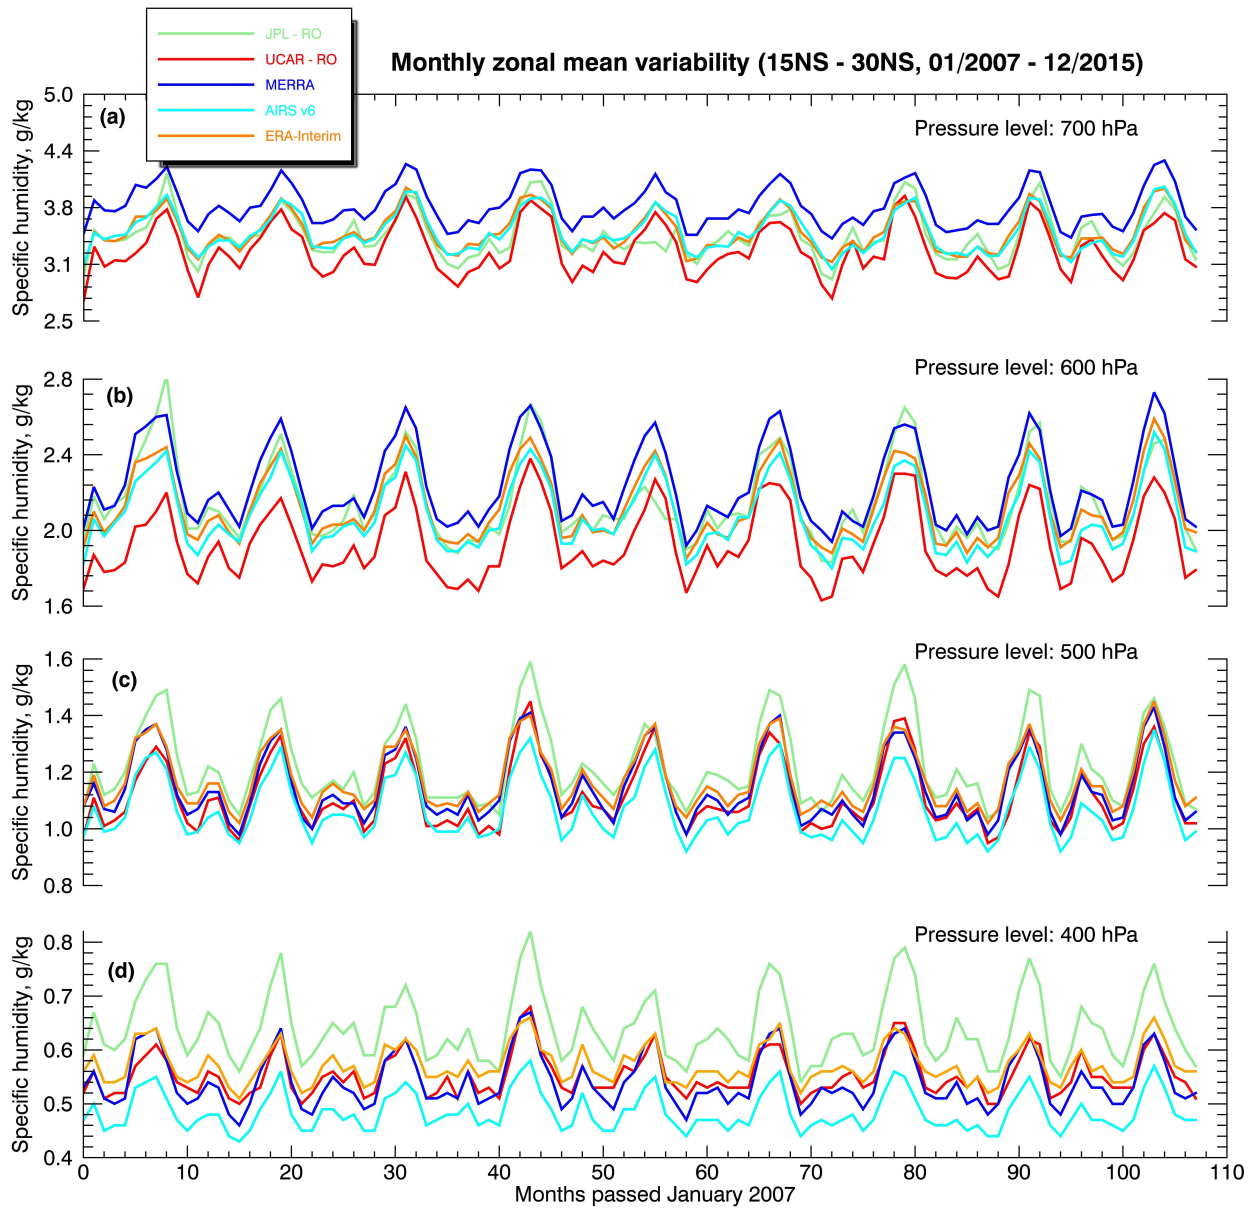

35

36 **Figure S1.** This is the same as figure 1, but for the 15NS–30NS latitudinal belt.

37

38

39

40

41

42

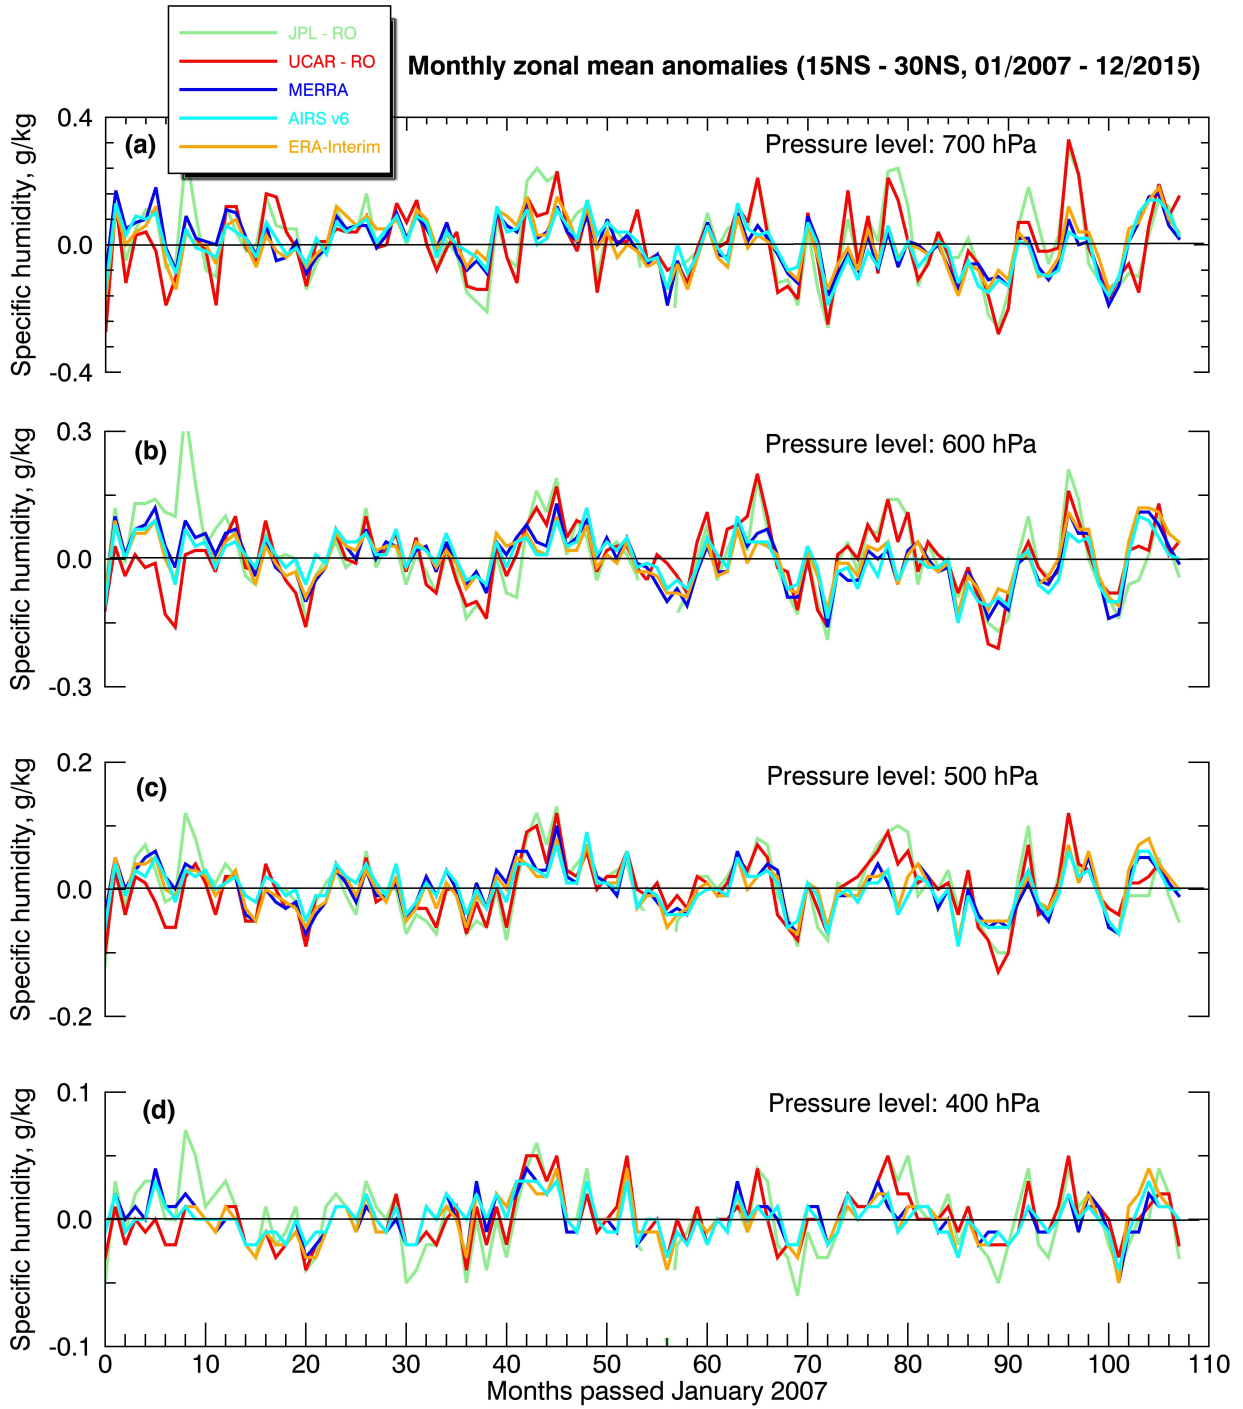

43

44 **Figure S2.** This is the same as figure 2, but for the 15NS–30NS latitudinal belt.

45

46

47



48 **Table S2.** This is the same as Table 1, but for the subtropics  $\pm 30\text{-}40^\circ$  region.

49

| <b>PART I: 9-Year long mean of specific humidity climatology with 2-sigma uncertainty, g kg<sup>-1</sup></b>                     |                                 |                                |                                |                                |                                 |
|----------------------------------------------------------------------------------------------------------------------------------|---------------------------------|--------------------------------|--------------------------------|--------------------------------|---------------------------------|
| <b>Data Records</b>                                                                                                              | <b>JPL</b>                      | <b>UCAR</b>                    | <b>ERA-Interim</b>             | <b>MERRA</b>                   | <b>AIRS</b>                     |
| 400 hPa                                                                                                                          | 0.64 ± 0.12                     | 0.44 ± 0.08                    | 0.46 ± 0.10                    | 0.42 ± 0.12                    | 0.37 ± 0.08                     |
| 500 hPa                                                                                                                          | 1.01 ± 0.26                     | 0.88 ± 0.22                    | 0.94 ± 0.28                    | 0.92 ± 0.18                    | 0.82 ± 0.26                     |
| 600 hPa                                                                                                                          | 1.59 ± 0.36                     | 1.44 ± 0.34                    | 1.62 ± 0.52                    | 1.61 ± 0.48                    | 1.48 ± 0.50                     |
| 700 hPa                                                                                                                          | 2.44 ± 0.52                     | 2.25 ± 0.52                    | 2.50 ± 0.64                    | 2.64 ± 0.68                    | 2.38 ± 0.76                     |
| <b>PART II: 9-Year long mean of deviations from JPL, g kg<sup>-1</sup></b>                                                       |                                 |                                |                                |                                |                                 |
| 400 hPa                                                                                                                          | n/a                             | - 0.26                         | - 0.24                         | - 0.28                         | - 0.32                          |
| 500 hPa                                                                                                                          | n/a                             | - 0.13                         | - 0.07                         | - 0.09                         | - 0.20                          |
| 600 hPa                                                                                                                          | n/a                             | - 0.15                         | + 0.03                         | + 0.02                         | - 0.11                          |
| 700 hPa                                                                                                                          | n/a                             | - 0.19                         | + 0.06                         | + 0.20                         | - 0.06                          |
| <b>PART III: Linear regression of specific humidity anomalies with 2-sigma uncertainty, g kg<sup>-1</sup> month<sup>-1</sup></b> |                                 |                                |                                |                                |                                 |
| 400 hPa                                                                                                                          | $(-1.3 \pm 2.0) \times 10^{-4}$ | $(1.1 \pm 1.0) \times 10^{-4}$ | $(1.1 \pm 0.8) \times 10^{-4}$ | $(1.0 \pm 0.8) \times 10^{-4}$ | $(0.8 \pm 0.8) \times 10^{-4}$  |
| 500 hPa                                                                                                                          | $(-1.4 \pm 2.4) \times 10^{-4}$ | $(1.1 \pm 2.0) \times 10^{-4}$ | $(1.6 \pm 1.6) \times 10^{-4}$ | $(0.3 \pm 1.6) \times 10^{-4}$ | $(0.4 \pm 1.4) \times 10^{-4}$  |
| 600 hPa                                                                                                                          | $(-2.0 \pm 4.2) \times 10^{-4}$ | $(2.8 \pm 3.4) \times 10^{-4}$ | $(2.1 \pm 2.6) \times 10^{-4}$ | $(0.4 \pm 2.8) \times 10^{-4}$ | $(-3.1 \pm 2.2) \times 10^{-4}$ |
| 700 hPa                                                                                                                          | $(-0.3 \pm 5.8) \times 10^{-4}$ | $(3.9 \pm 4.6) \times 10^{-4}$ | $(4.0 \pm 3.6) \times 10^{-4}$ | $(2.9 \pm 4.0) \times 10^{-4}$ | $(-4.5 \pm 3.2) \times 10^{-4}$ |

50

51

52

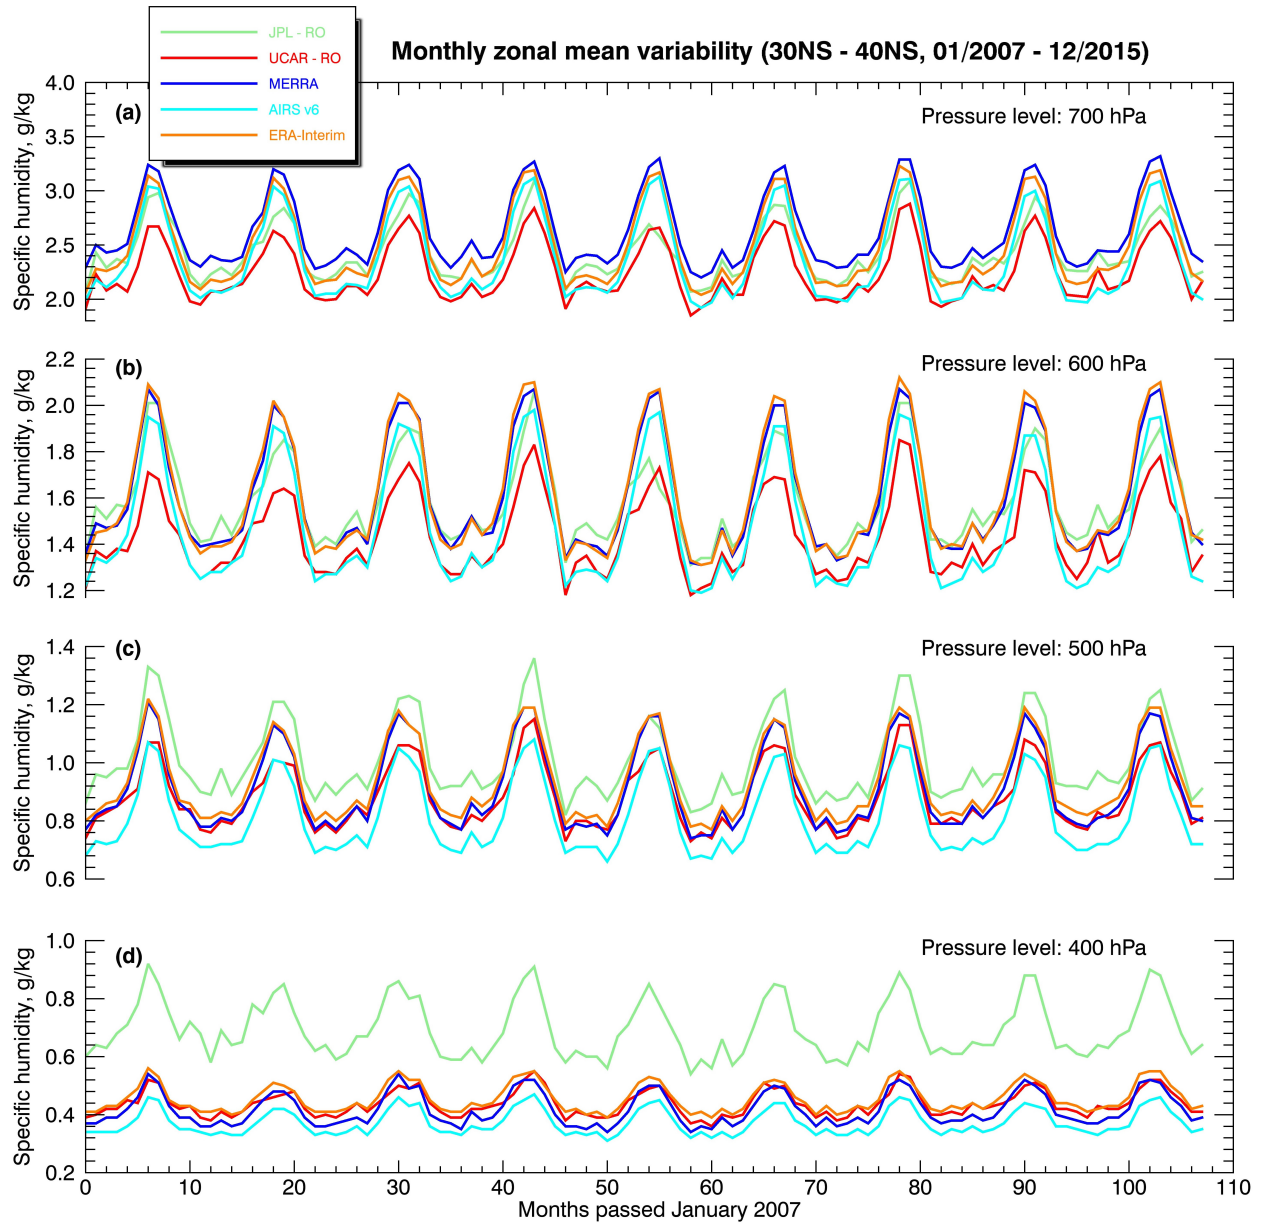

53

54 **Figure S3.** This is the same as figure 1, but for the subtropics at 30NS–30NS.

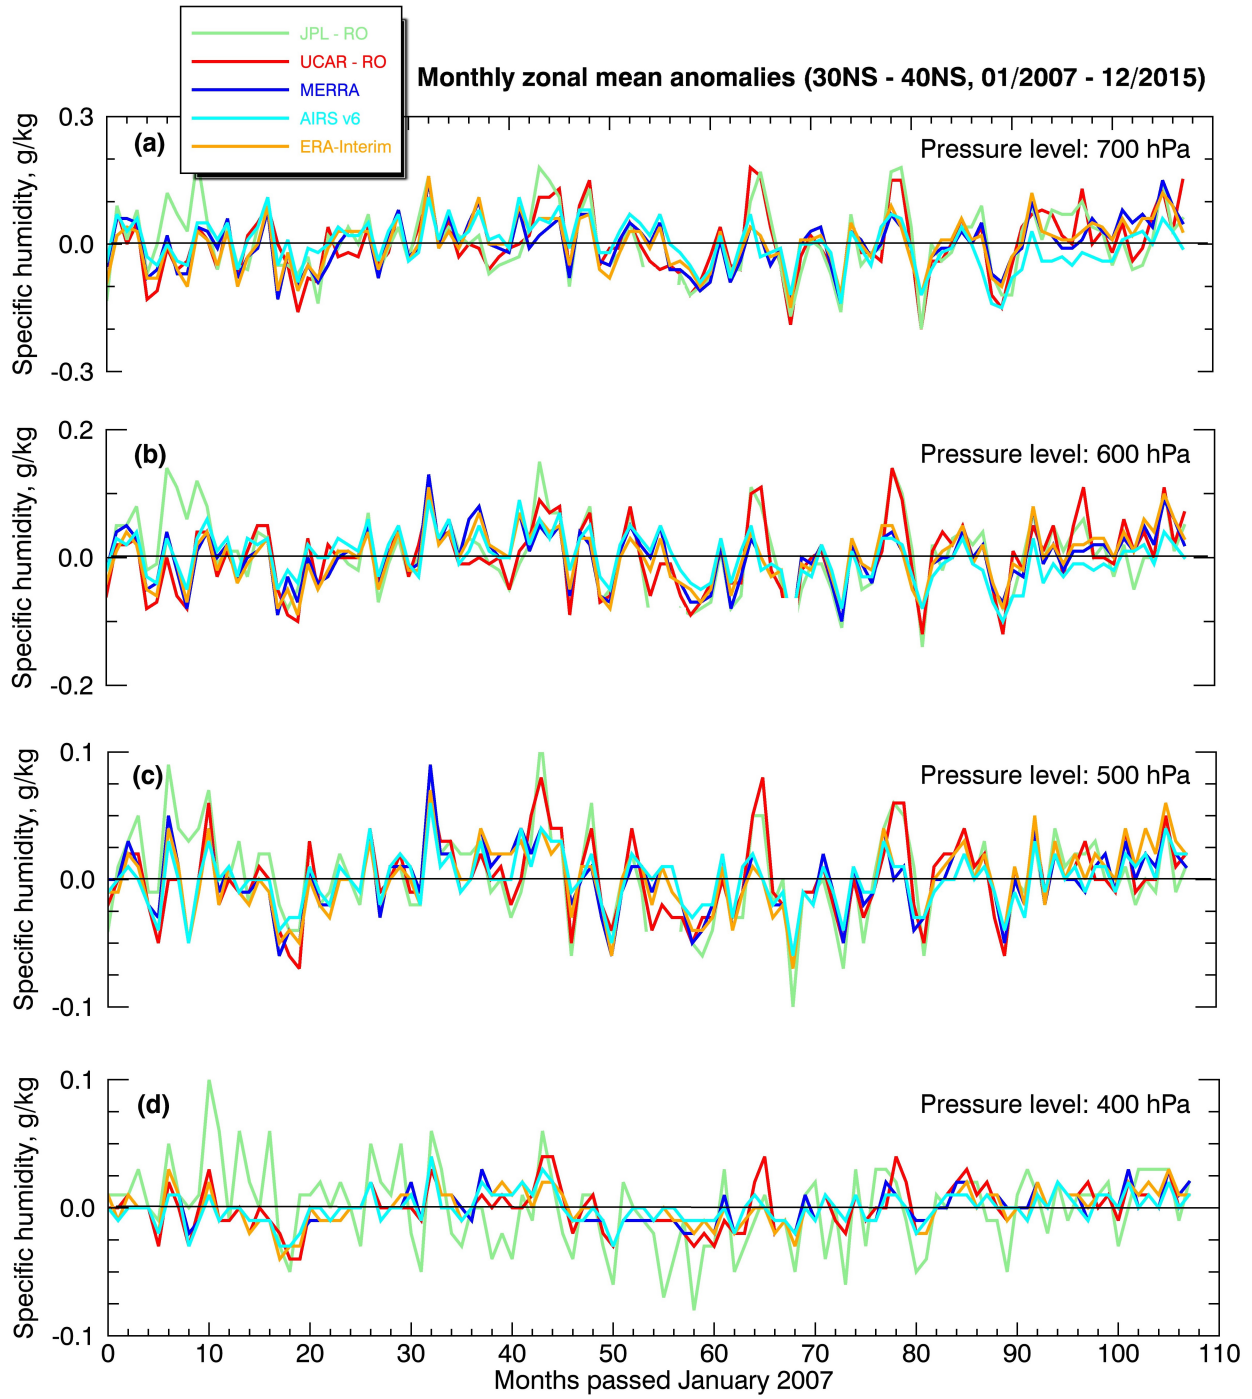

55

56 **Figure S4.** This is the same as figure 2, but for the subtropics  $\pm 30\text{--}40\text{NS}$  region.
